# Supplementary material
Source: PubMed Central journal article supplement (PMC4718457)

**Figure 1**

**C**

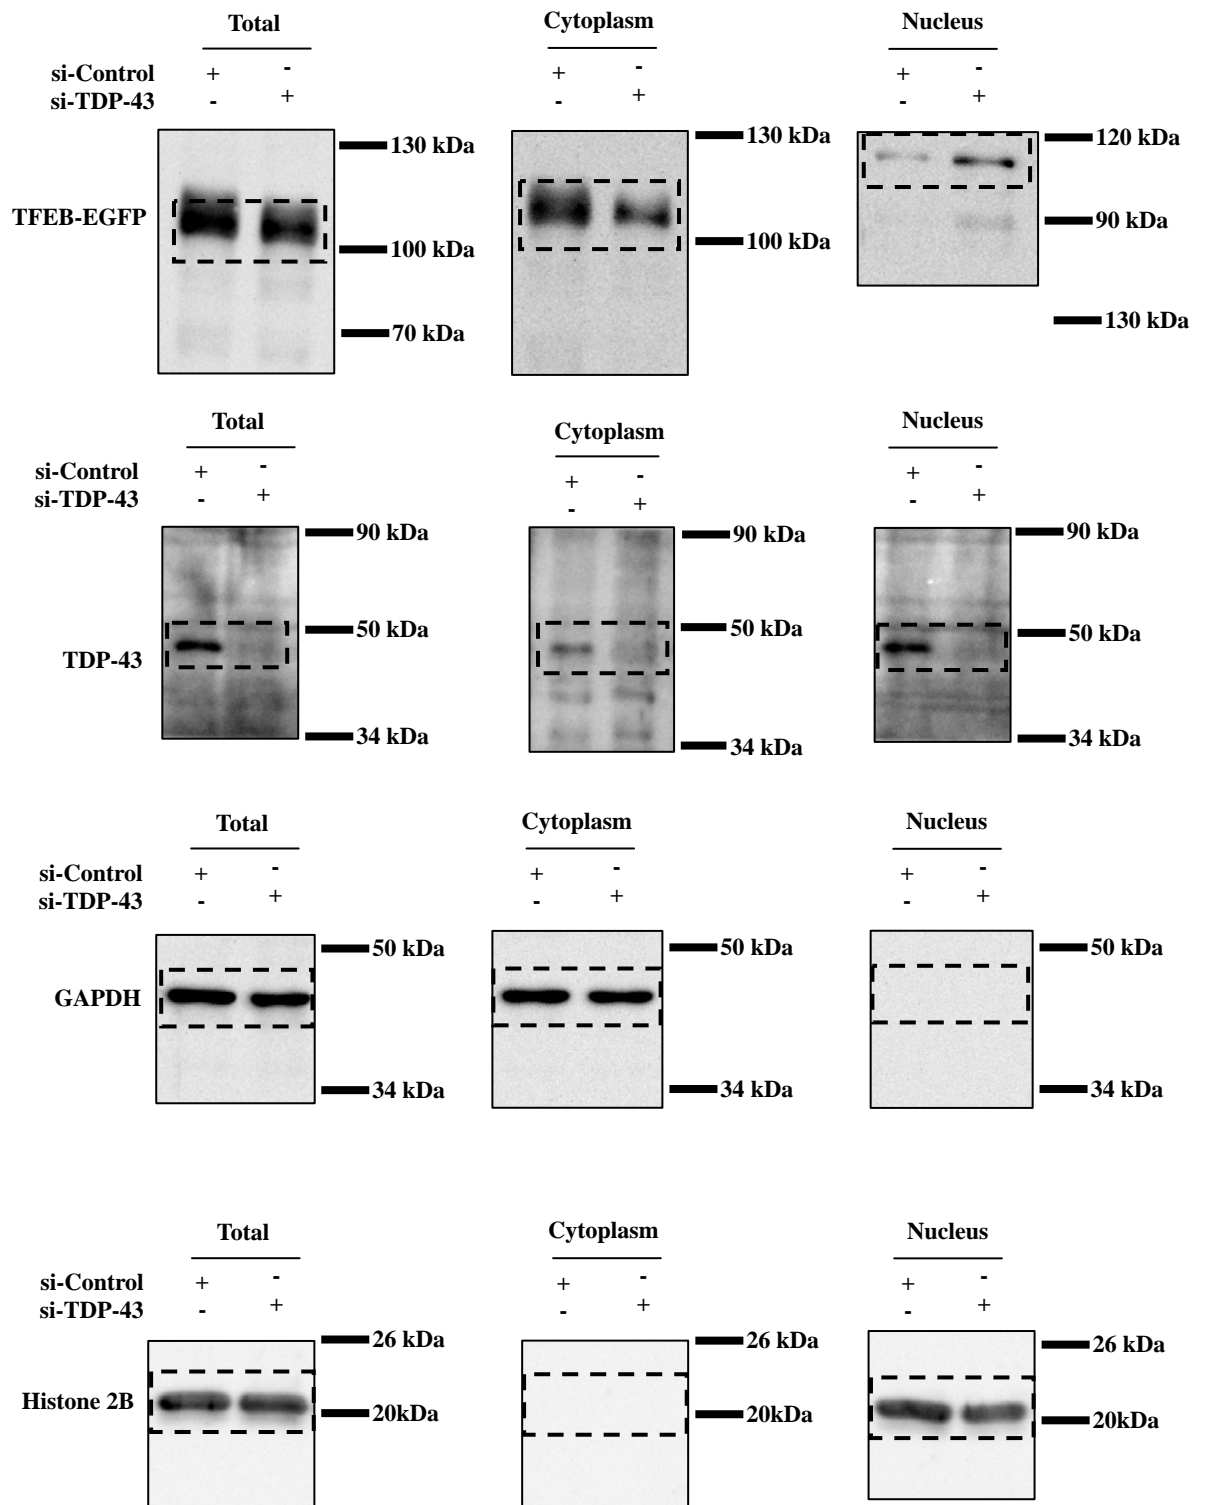

Supplement: EMBJ-35-121-s003.pdf [file EMBJ-35-121-s003.pdf]

**Figure 2**

**B**

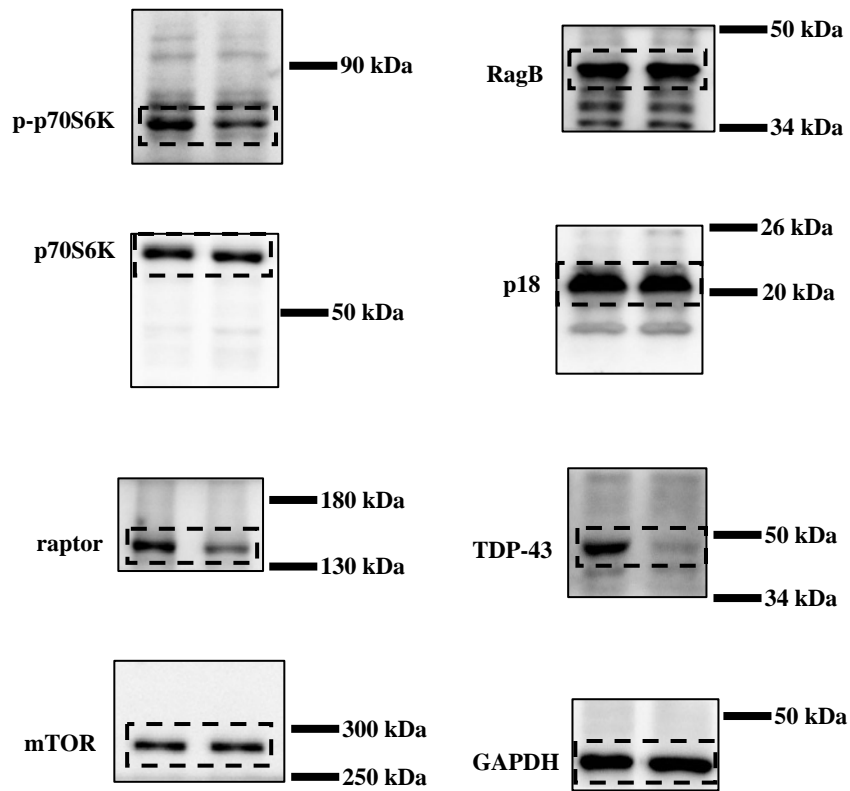

**D**

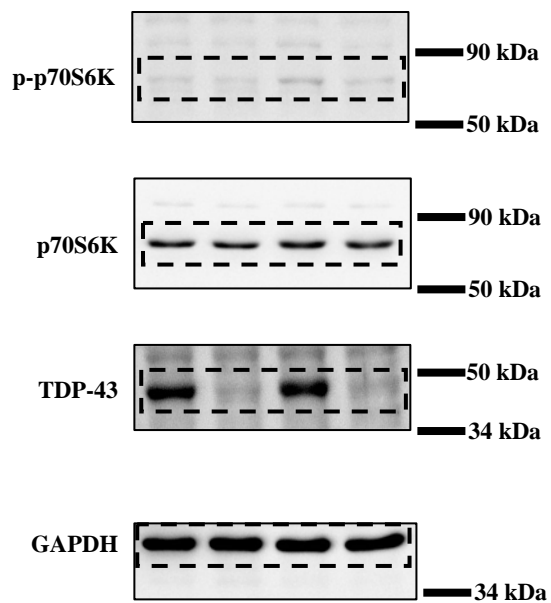

Supplement: EMBJ-35-121-s004.pdf [file EMBJ-35-121-s004.pdf]

**Figure 4**

**A**

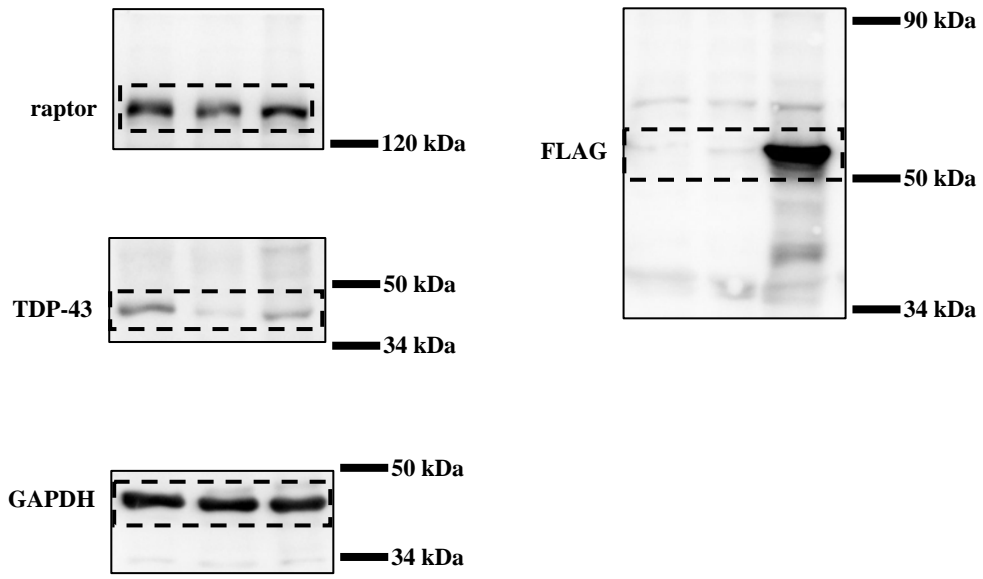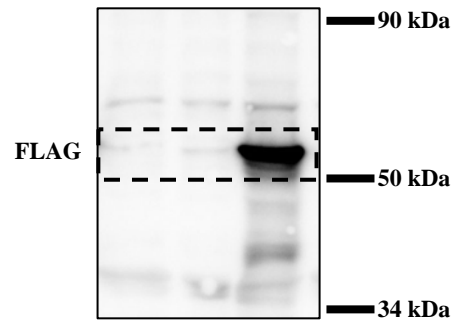

**C**

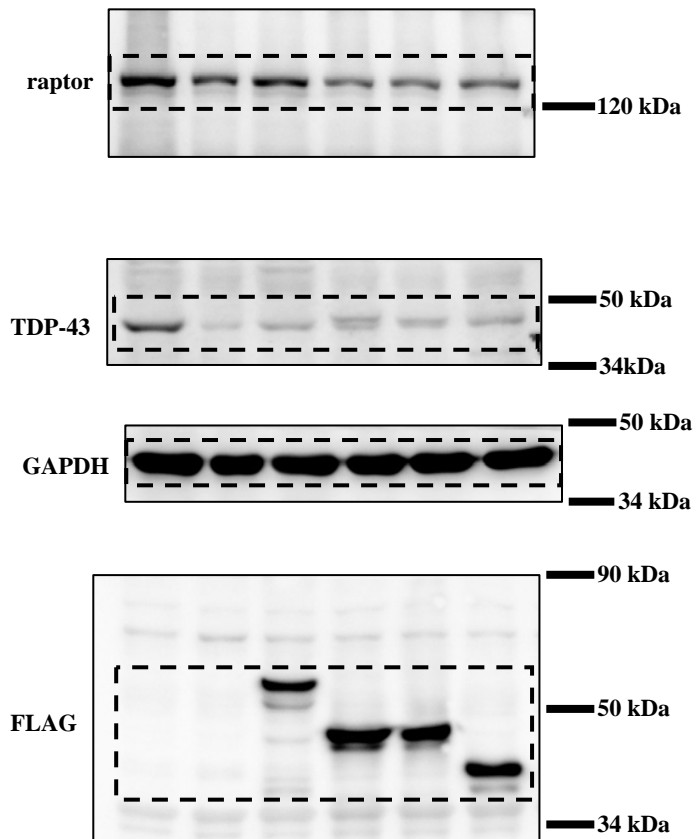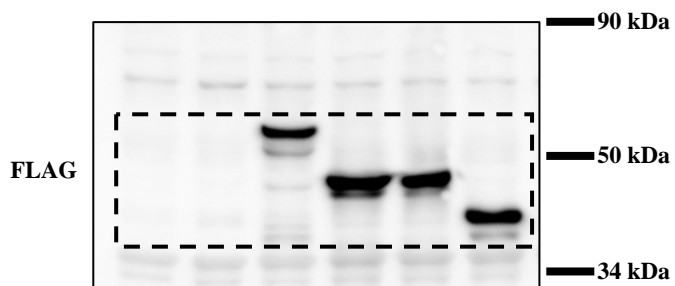

# Figure 4 Continued

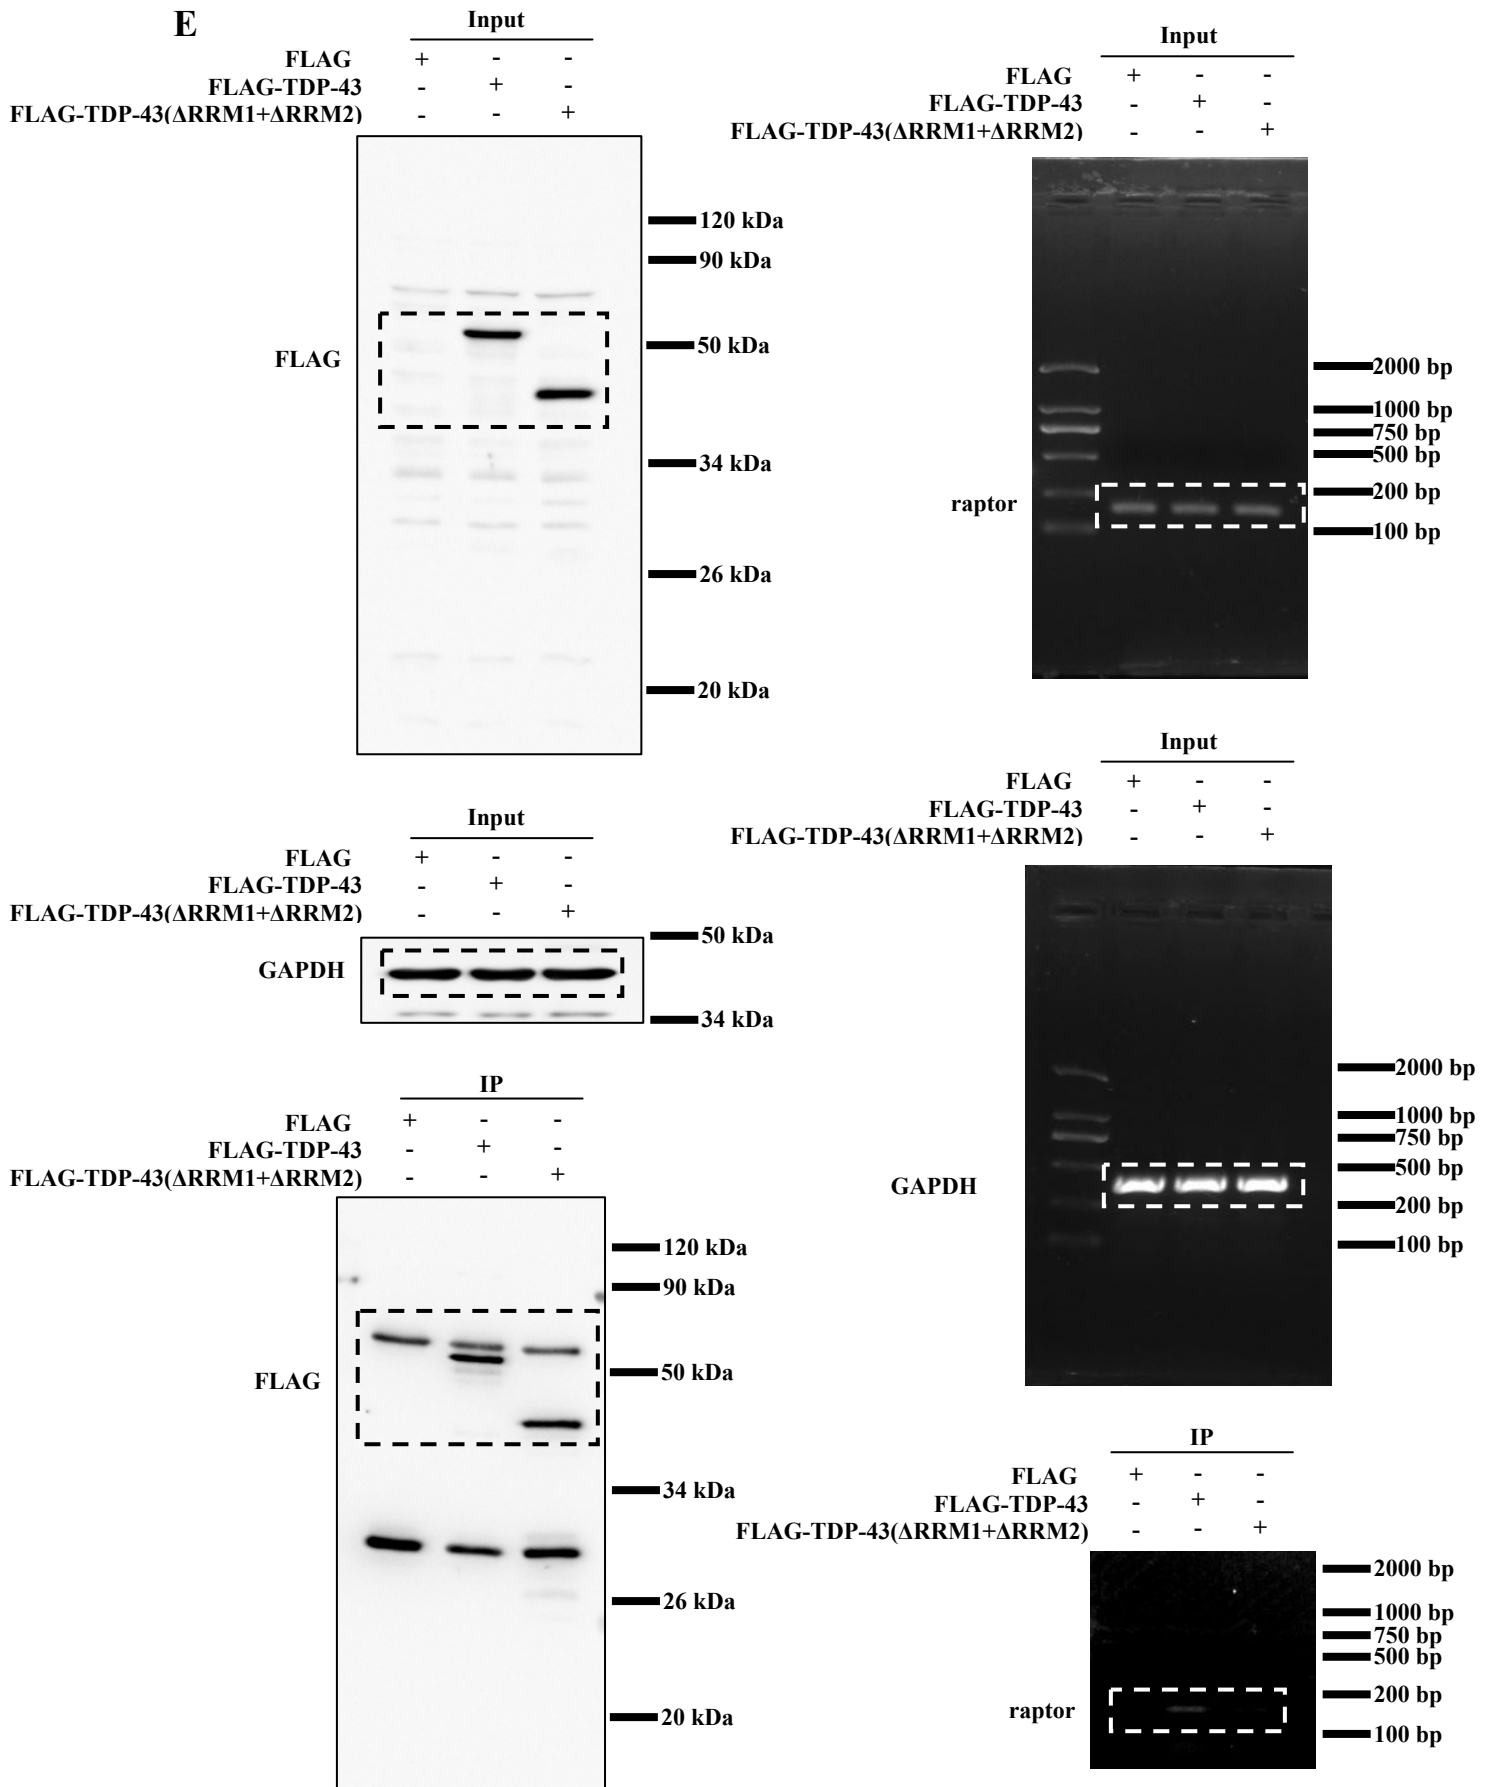

Supplement: EMBJ-35-121-s005.pdf [file EMBJ-35-121-s005.pdf]

**Figure 5**

**C**

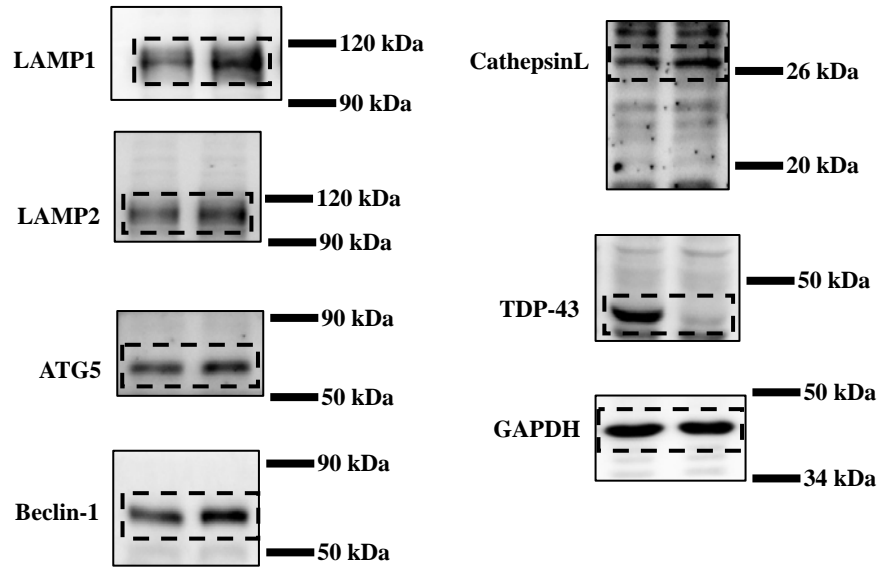

**E**

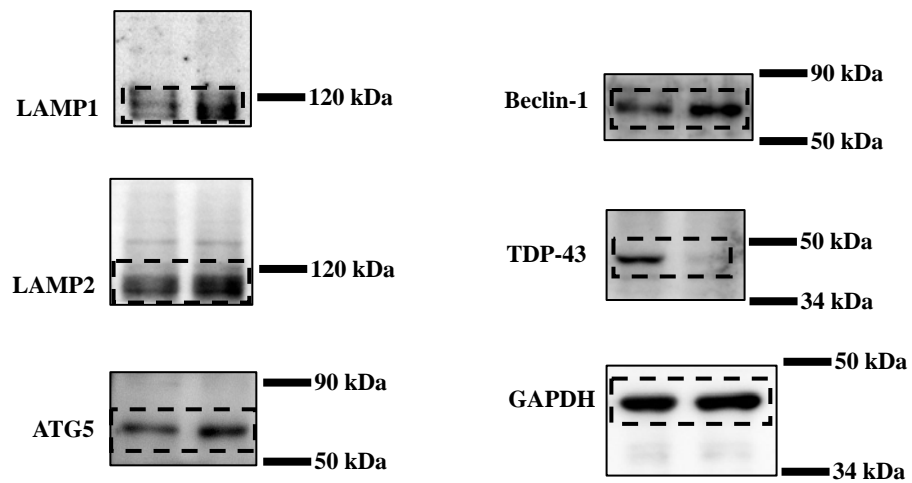

**F**

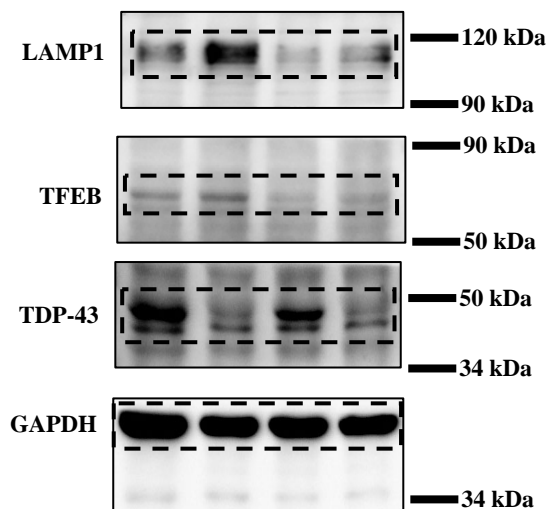

Supplement: EMBJ-35-121-s006.pdf [file EMBJ-35-121-s006.pdf]

**Figure 6**

**A**

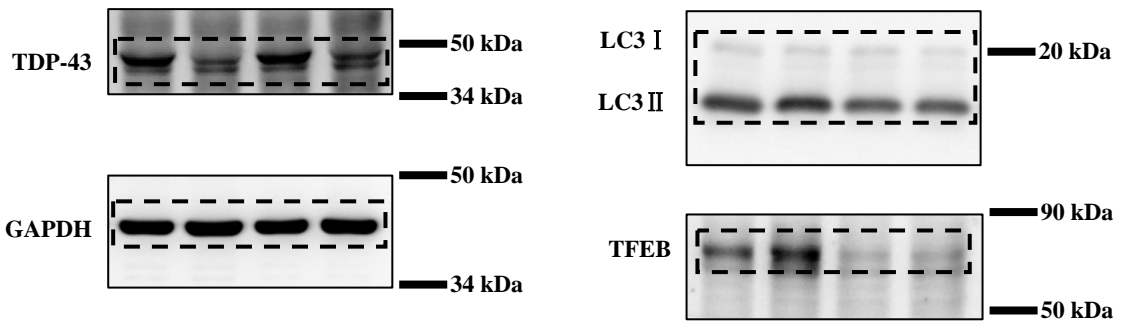

**C**

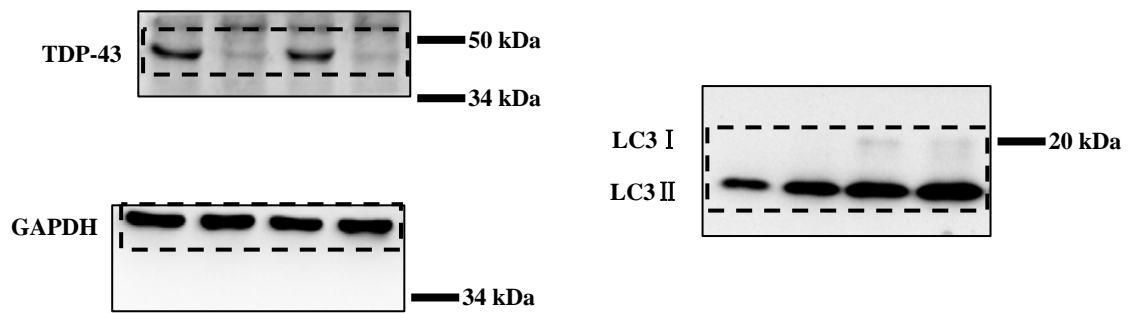

**G**

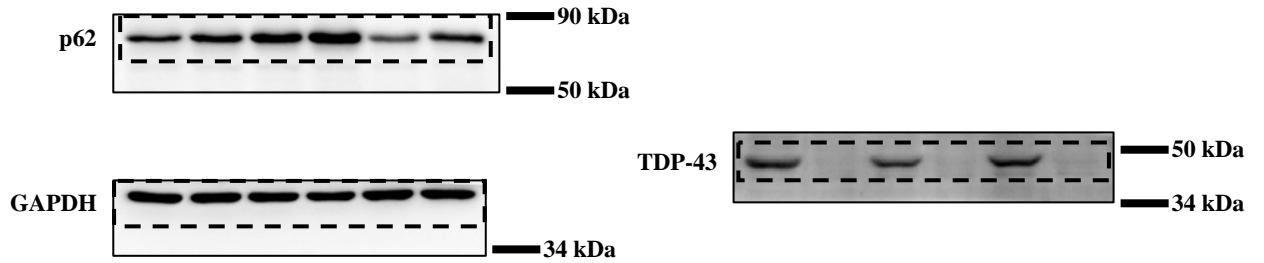

Supplement: EMBJ-35-121-s007.pdf [file EMBJ-35-121-s007.pdf]

**Figure 7**

**A**

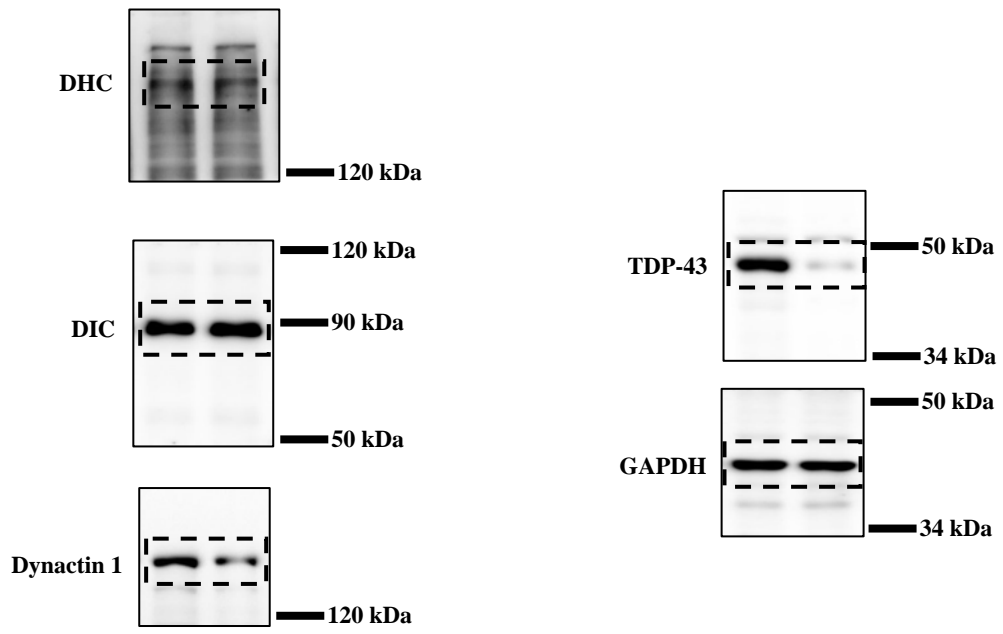

Supplement: EMBJ-35-121-s008.pdf [file EMBJ-35-121-s008.pdf]

**Figure 8**

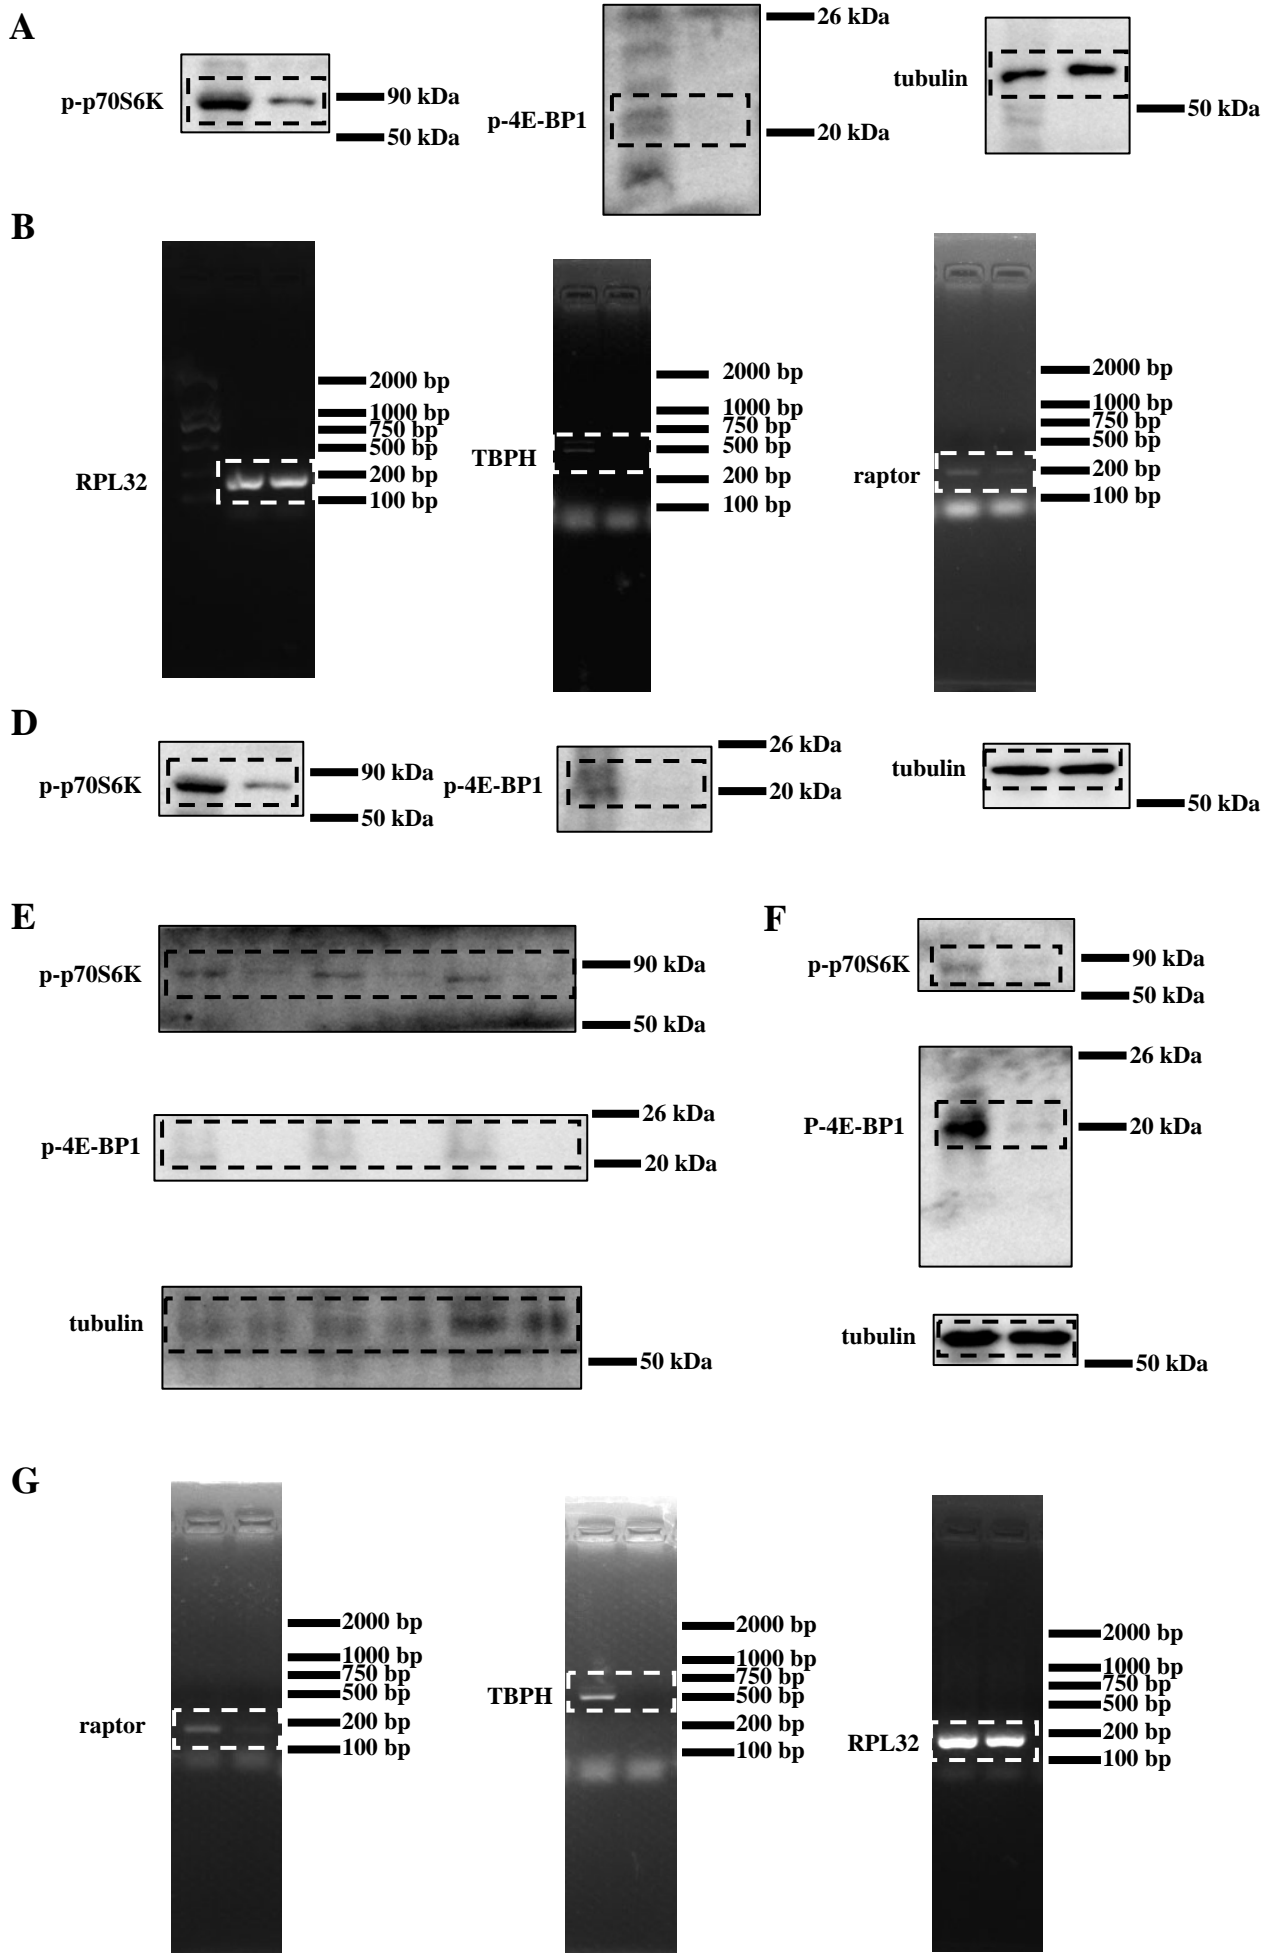

Supplement: EMBJ-35-121-s009.pdf [file EMBJ-35-121-s009.pdf]
